# Supplementary material for: La2O3 interface modification of mesoporous TiO2 nanostructures enabling highly efficient perovskite solar cells
Source: Royal Society of Chemistry journal article supplement (doi:10.1039/c6ta05008e), 2016-01-01
Supplement: c6ta05008e1.pdf [file c6ta05008e1.pdf]

## Electronic Supplementary Information

### La<sub>2</sub>O<sub>3</sub> Interface Modification of Mesoporous TiO<sub>2</sub> Nanostructures Enabling Highly Efficient Perovskite Solar Cells

Shoyebmohamad F. Shaikh, Hyeok-Chan Kwon, Wooseok Yang, Hyewon Hwang, Hongseuk Lee, Eunsong Lee, Sun Ihl Ma, and Jooho Moon\*

Department of Materials Science and Engineering, Yonsei University  
Seoul 120-749, Republic of Korea

\*Corresponding author, e-mail: [jmoon@yonsei.ac.kr](mailto:jmoon@yonsei.ac.kr), Tel.: +82-2-2123-2855, Fax: +82-2-312-5375.

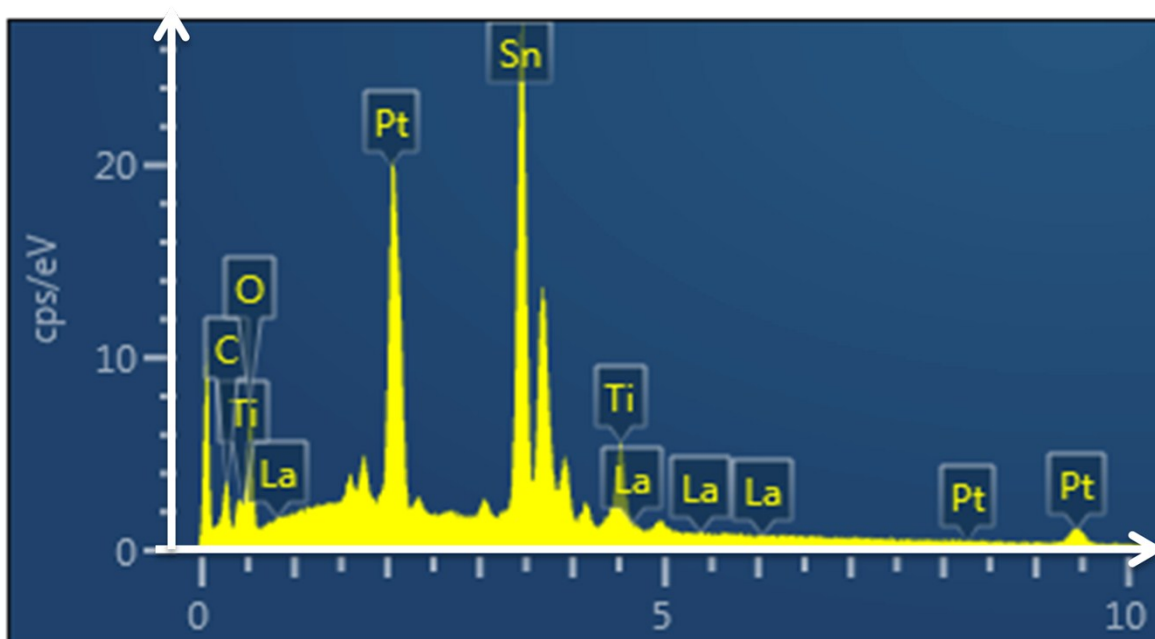

**Fig. S1** EDX analysis of an FE-SEM image of mp-TiO<sub>2</sub>-La<sub>2</sub>O<sub>3</sub> ETL on an FTO substrate.

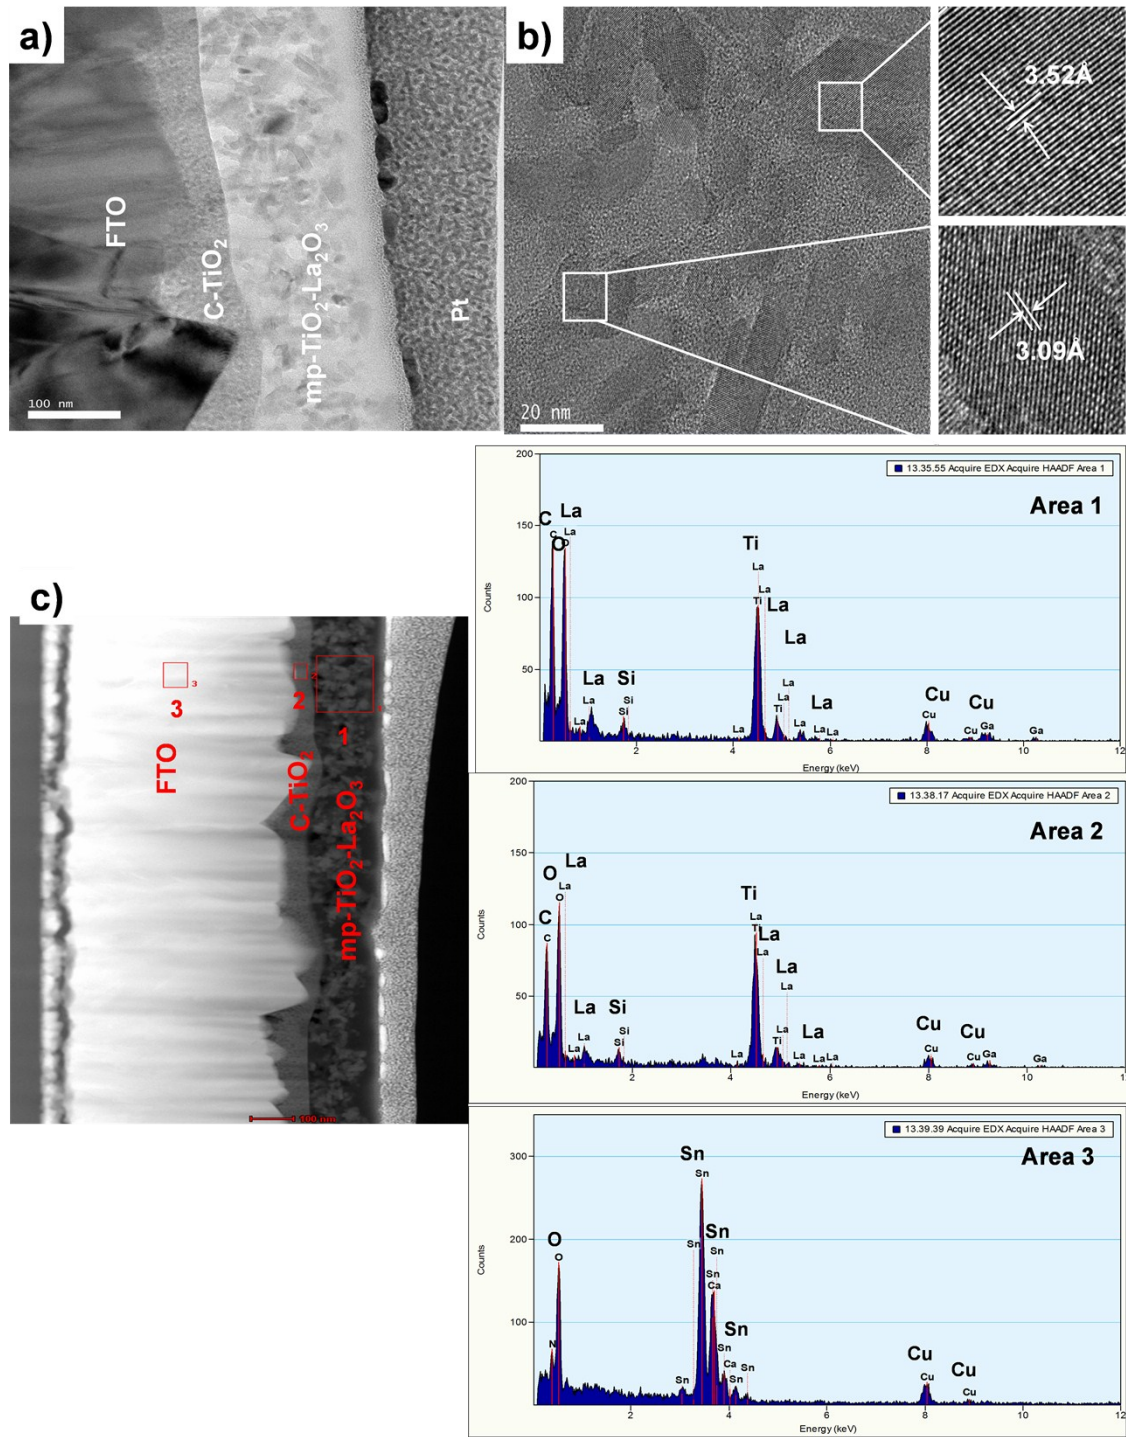

**Fig. S2** a) A focused ion beam (FIB) cross-sectioned high resolution transmission electron microscopy (HRTEM) image of mp-TiO<sub>2</sub>-La<sub>2</sub>O<sub>3</sub>, b) high-magnification TEM images of mp-TiO<sub>2</sub>-La<sub>2</sub>O<sub>3</sub> with *d*-spacing analyses (insets), and c) EDX analysis of FIB cross-sectioned interfaces of FTO/C-TiO<sub>2</sub>/mp-TiO<sub>2</sub>-La<sub>2</sub>O<sub>3</sub> ETLs.

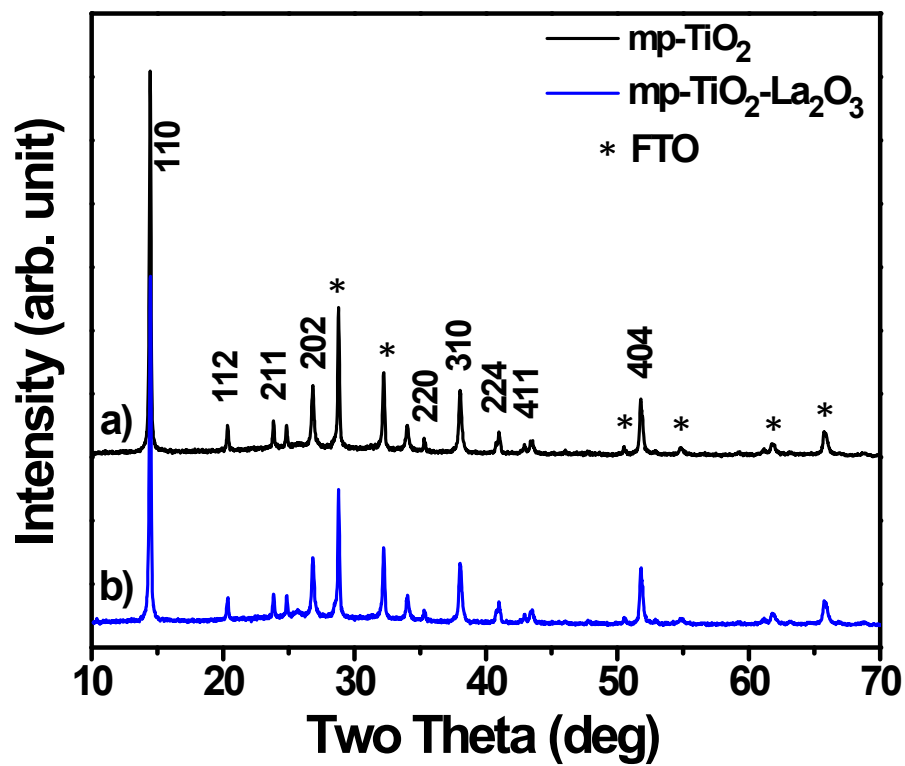

**Fig. S3** XRD patterns of (a) mp-TiO<sub>2</sub>/CH<sub>3</sub>NH<sub>3</sub>PbI<sub>3</sub> and (b) mp-TiO<sub>2</sub>-La<sub>2</sub>O<sub>3</sub>/CH<sub>3</sub>NH<sub>3</sub>PbI<sub>3</sub>. The asterisks (\*) indicate FTO substrate peaks.

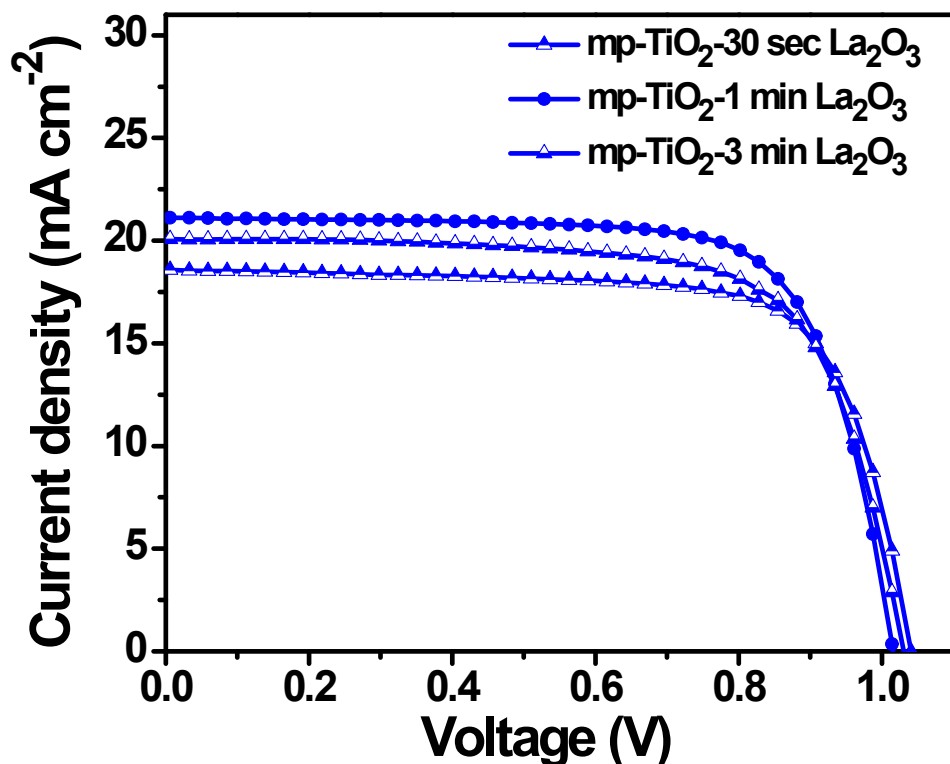

**Fig. S4**  $J$ - $V$  characteristics of an FTO/mp-TiO<sub>2</sub>-La<sub>2</sub>O<sub>3</sub>/CH<sub>3</sub>NH<sub>3</sub>PbI<sub>3</sub>/spiro-OMeTAD/gold device under illumination of simulated AM1.5G light (100 mW cm<sup>-2</sup>). The La<sub>2</sub>O<sub>3</sub> interface modification layers were varied using different dip coating times of 30 s, 1 min, and 3 min. The scan rate was constant at 8.6 mV s<sup>-1</sup> for all the measurements.

**Table S1** Summary of photovoltaic performance metrics of the champion devices fabricated by varying the dip coating times

| ETL                                                       | $J_{sc}$ (mA cm <sup>-2</sup> ) | $V_{oc}$ (V) | $FF$ (%) | PCE (%) |
|-----------------------------------------------------------|---------------------------------|--------------|----------|---------|
| mp-TiO <sub>2</sub> -30 s La <sub>2</sub> O <sub>3</sub>  | 18.63                           | 1.00         | 67.01    | 12.53   |
| mp-TiO <sub>2</sub> -1 min La <sub>2</sub> O <sub>3</sub> | 20.84                           | 1.01         | 74.64    | 15.81   |
| mp-TiO <sub>2</sub> -3 min La <sub>2</sub> O <sub>3</sub> | 20.36                           | 1.01         | 70.64    | 14.55   |

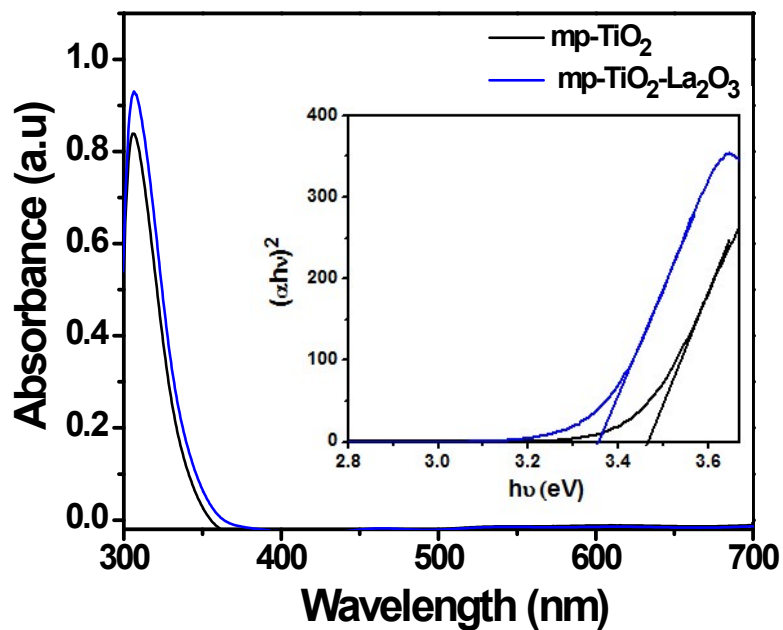

**Fig. S5** UV-vis absorbance spectra of mp-TiO<sub>2</sub> and mp-TiO<sub>2</sub>-La<sub>2</sub>O<sub>3</sub> ETLs before depositing CH<sub>3</sub>NH<sub>3</sub>PbI<sub>3</sub>. The inset Tauc plot shows the band gap positions of the mp-TiO<sub>2</sub> and mp-TiO<sub>2</sub>-La<sub>2</sub>O<sub>3</sub> ETLs.

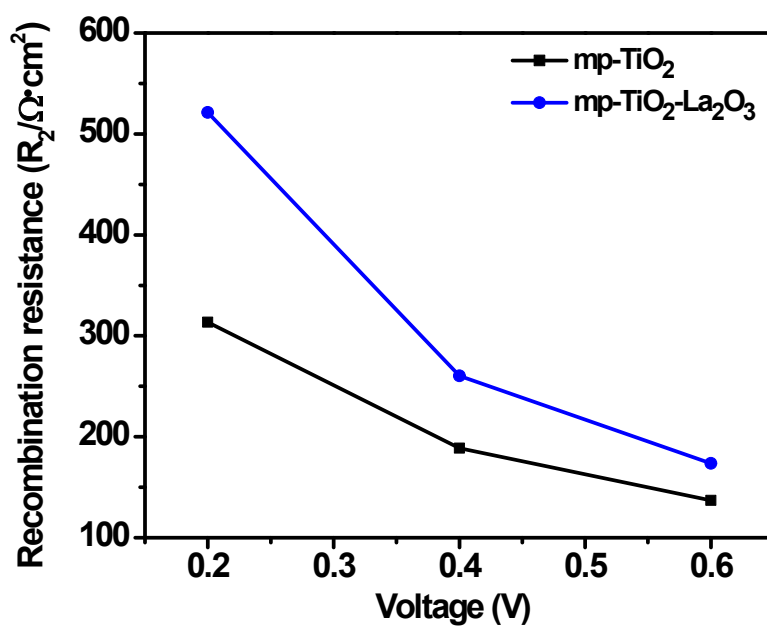

**Fig. S6** Recombination resistances of both mp-TiO<sub>2</sub> ETL- and mp-TiO<sub>2</sub>-La<sub>2</sub>O<sub>3</sub> ETL-based devices obtained at different bias potentials under illumination of 100 mW cm<sup>-2</sup> AM 1.5.

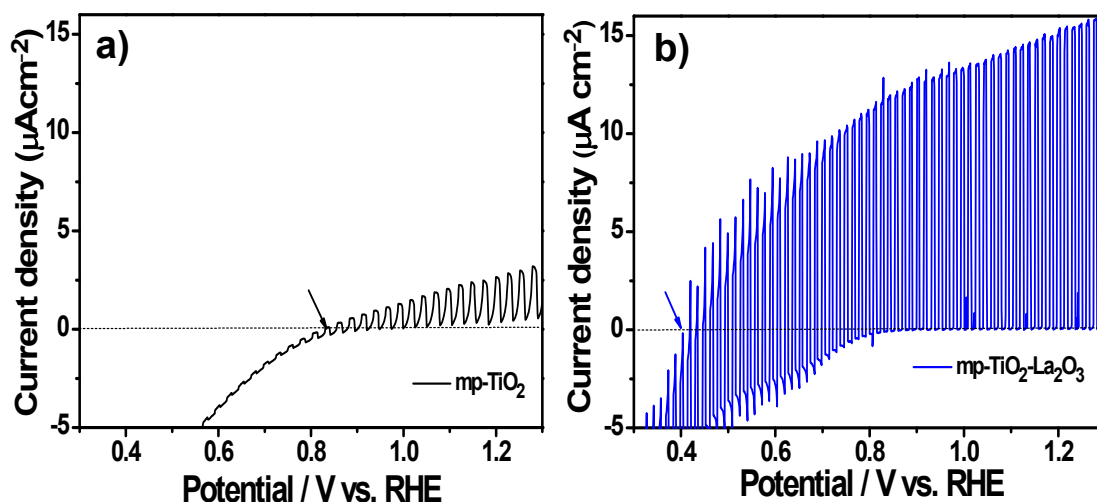

**Fig. S7** Photocurrent-potential curve measured in a 0.5 M aqueous Na<sub>2</sub>SO<sub>4</sub> solution under illumination of simulated AM1.5 light. The measurement was performed using the three-electrode configuration with a Ag/AgCl electrode as the reference electrode, Pt mesh as the counter electrode, and either (a) FTO/mp-TiO<sub>2</sub> or (b) FTO/mp-TiO<sub>2</sub>-La<sub>2</sub>O<sub>3</sub> as the working electrode in a 0.5 M aqueous Na<sub>2</sub>SO<sub>4</sub> solution.

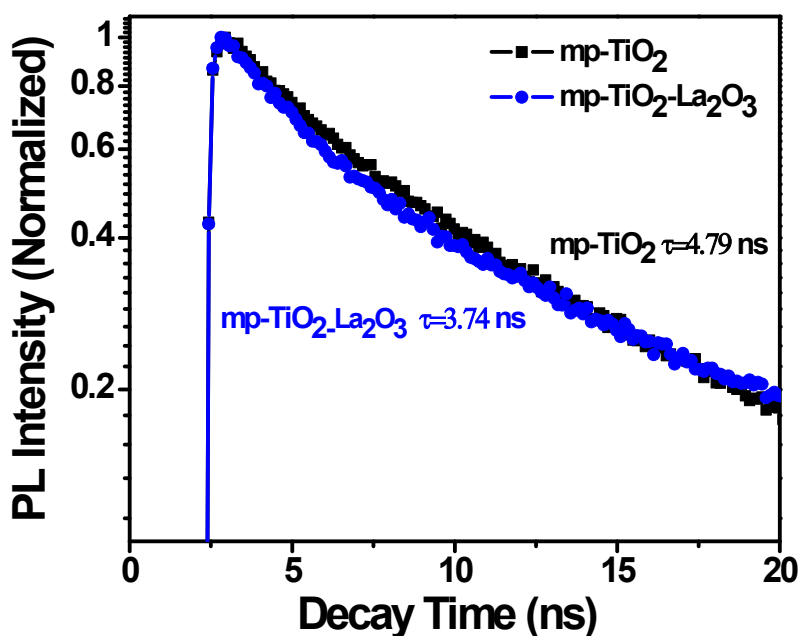

**Fig. S8** Time-resolved PL spectra of both ETL samples on a glass substrate including glass/mp-TiO<sub>2</sub>/CH<sub>3</sub>NH<sub>3</sub>PbI<sub>3</sub> and glass/mp-TiO<sub>2</sub>-La<sub>2</sub>O<sub>3</sub>/CH<sub>3</sub>NH<sub>3</sub>PbI<sub>3</sub>.

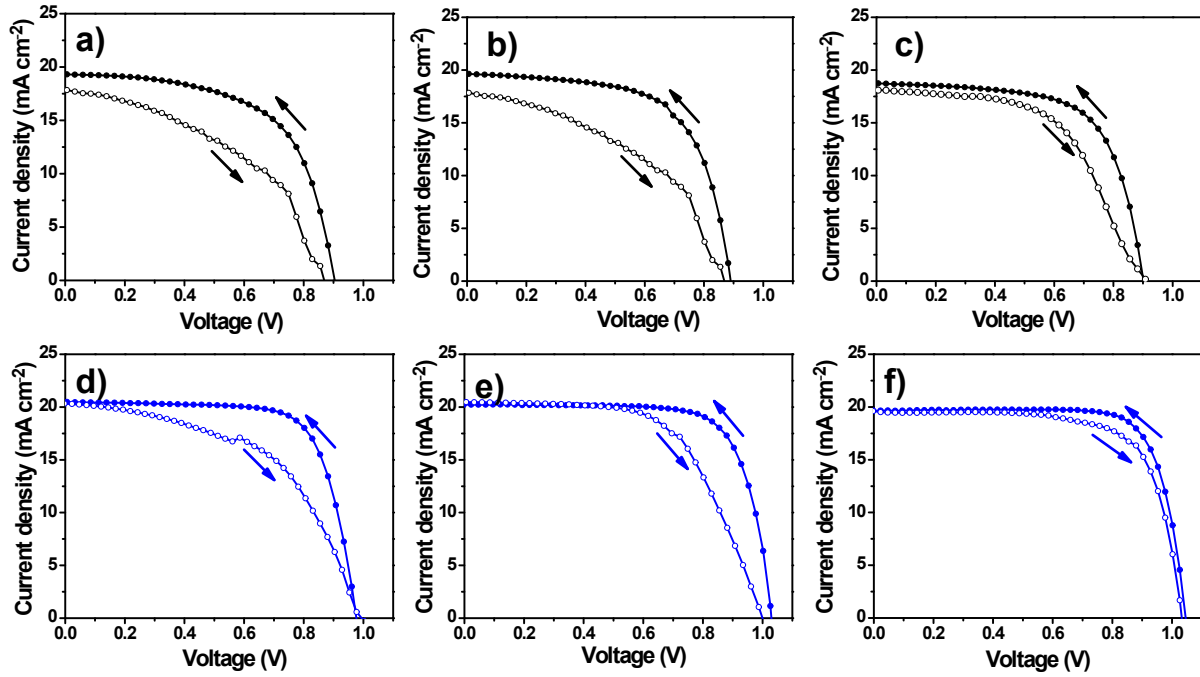

**Fig. S9**  $J$ - $V$  characteristics of forward and reverse scans for both FTO/mp-TiO<sub>2</sub>/CH<sub>3</sub>NH<sub>3</sub>PbI<sub>3</sub>/spiro-OMeTAD/Au and FTO/mp-TiO<sub>2</sub>-La<sub>2</sub>O<sub>3</sub>/CH<sub>3</sub>NH<sub>3</sub>PbI<sub>3</sub>/spiro-OMeTAD/Au devices under illumination of simulated AM1.5G light (100 mW cm<sup>-2</sup>) at different scan rates of (a, d) 520, (b, e) 52, and (c, f) 8.6 mV s<sup>-1</sup>.

**Table S2** Photovoltaic parameters of both FTO/mp-TiO<sub>2</sub>/CH<sub>3</sub>NH<sub>3</sub>PbI<sub>3</sub>/spiro-OMeTAD/Au and FTO/mp-TiO<sub>2</sub>-La<sub>2</sub>O<sub>3</sub>/CH<sub>3</sub>NH<sub>3</sub>PbI<sub>3</sub>/spiro-OMeTAD/Au devices shown in Fig. S9 (a-f) as a function of scan rate and scan direction

| Scan rate (mV s <sup>-1</sup> ) | ETLs                                                | Scan direction | $J_{sc}$ (mA cm <sup>-2</sup> ) | $V_{oc}$ (V) | $FF$ (%) | PCE (%) |
|---------------------------------|-----------------------------------------------------|----------------|---------------------------------|--------------|----------|---------|
| 520                             | mp-TiO <sub>2</sub>                                 | Reverse        | 19.28                           | 0.90         | 60.44    | 10.53   |
|                                 |                                                     | Forward        | 18.20                           | 0.88         | 39.45    | 6.53    |
|                                 | mp-TiO <sub>2</sub> -La <sub>2</sub> O <sub>3</sub> | Reverse        | 20.48                           | 1.00         | 73.19    | 15.02   |
|                                 |                                                     | Forward        | 20.33                           | 1.04         | 52.25    | 10.55   |
| 52                              | mp-TiO <sub>2</sub>                                 | Reverse        | 19.63                           | 0.89         | 63.42    | 11.08   |
|                                 |                                                     | Forward        | 17.88                           | 0.86         | 44.32    | 6.83    |
|                                 | mp-TiO <sub>2</sub> -La <sub>2</sub> O <sub>3</sub> | Reverse        | 20.21                           | 0.99         | 74.52    | 15.48   |
|                                 |                                                     | Forward        | 20.44                           | 1.02         | 59.68    | 11.87   |
| 8.7                             | mp-TiO <sub>2</sub>                                 | Reverse        | 18.73                           | 0.90         | 65.73    | 11.10   |
|                                 |                                                     | Forward        | 17.70                           | 0.87         | 57.83    | 8.98    |
|                                 | mp-TiO <sub>2</sub> -La <sub>2</sub> O <sub>3</sub> | Reverse        | 19.65                           | 1.03         | 77.44    | 15.81   |
|                                 |                                                     | Forward        | 19.63                           | 1.01         | 70.56    | 14.38   |

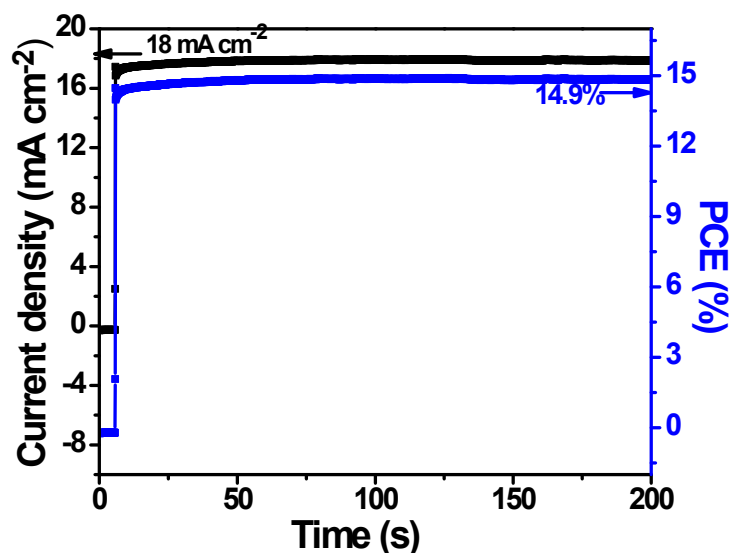

**Fig. S10** Stabilized photocurrent density (black) and PCE (blue) measured at the maximum power voltage of 0.83 V for 200 s.

**Table S3** Comparative study of interface modifications on TiO<sub>2</sub> ETLs for perovskite solar cell applications

| ETL Type and Material                                | Chemicals/ Method                      | J <sub>sc</sub> (mA cm <sup>-2</sup> ) | V <sub>oc</sub> (V) | FF (%) | PCE (%) | Approximate enhancement in PEC (%) | Reference    |
|------------------------------------------------------|----------------------------------------|----------------------------------------|---------------------|--------|---------|------------------------------------|--------------|
| mp-TiO <sub>2</sub>                                  | Cesium carbonate/ Spin coating         | 19.8                                   | 0.97                | 62.0   | 11.9    | 23                                 | [7]          |
| mp-TiO <sub>2</sub> -Cs <sub>2</sub> CO <sub>3</sub> |                                        | 21.3                                   | 1.03                | 65.0   | 14.2    |                                    |              |
| C-TiO <sub>2</sub>                                   | Polyoxyethylene/ Spin coating          | 17.9                                   | 1.00                | 66.0   | 11.8    | 20                                 | [10]         |
| C-TiO <sub>2</sub> -PEO                              |                                        | 20.7                                   | 1.02                | 65.0   | 13.8    |                                    |              |
| C-TiO <sub>2</sub>                                   | Cesium bromide/ Spin coating           | 18.7                                   | 0.99                | 69.0   | 13.1    | 32                                 | [15]         |
| C-TiO <sub>2</sub> -CsBr                             |                                        | 20.7                                   | 1.06                | 75.0   | 16.3    |                                    |              |
| mp-TiO <sub>2</sub>                                  | Magnesium methoxide/ Spin coating      | 20.11                                  | 0.85                | 67.1   | 11.4    | 13                                 | [19]         |
| mp-TiO <sub>2</sub> -MgO                             |                                        | 20.02                                  | 0.89                | 71.2   | 12.7    |                                    |              |
| mp-TiO <sub>2</sub>                                  | Aluminum tri-sec-butoxide/ Dip coating | 17.6                                   | 0.87                | 67.9   | 10.4    | 23                                 | [20]         |
| mp-TiO <sub>2</sub> -Al <sub>2</sub> O <sub>3</sub>  |                                        | 20.1                                   | 0.96                | 66.1   | 12.7    |                                    |              |
| mp-TiO <sub>2</sub>                                  | Lanthanum (III) nitrate/ Dip coating   | 18.73                                  | 0.90                | 65.73  | 11.10   | 46                                 | Present Work |
| mp-TiO <sub>2</sub> -La <sub>2</sub> O <sub>3</sub>  |                                        | 20.84                                  | 1.01                | 74.64  | 15.81   |                                    |              |
